# Supplementary material
Source: HighWire-hosted journal article supplement (https://gut.bmj.com/content/67/10/1881)
Supplement: inline-supplementary-material-1 [file inline-supplementary-material-1.pdf]

Supplementary Table 1. Patient Characteristics for qRT-PCR analysis of liver gene expression

|                              | <b>Control (n=6)</b>      | <b>NASH (n=27)</b>       |
|------------------------------|---------------------------|--------------------------|
| <b>Age (yr)</b>              | 14.8 ± 10.14 <sup>a</sup> | 12.3 ± 2.5               |
| <b>Gender (M%)</b>           | 33% <sup>b</sup>          | 70%                      |
| <b>BMI z-score</b>           | -                         | 2.25 ± 0.57              |
| <b>AST (U/L)</b>             | Normal                    | 59.6 ± 25.6 <sup>c</sup> |
| <b>ALT (U/L)</b>             | Normal                    | 95.1 ± 51.2              |
| <b>ALP (U/L)</b>             | -                         | 181.3 ± 108.4            |
| <b>GGT (U/L)</b>             | -                         | 49.1 ± 31.9              |
| <b>HbA1c (%)</b>             | -                         | 5.5 ± 0.7                |
| <b>Glucose (mg/dL)</b>       | -                         | 89.8 ± 13.7              |
| <b>Insulin (mIU/L)</b>       | -                         | 23.3 ± 15.3              |
| <b>HOMA-IR</b>               | -                         | 5.2 ± 0.7                |
| <b>Cholesterol (mg/dL)</b>   | -                         | 178.7 ± 50.7             |
| <b>Triglycerides (mg/dL)</b> | -                         | 132 ± 77.1               |

BMI, Body Mass Index; AST, Aspartate Amino Transferase; ALT, Alanine Amino Transferase; ALP, Alkaline Phosphatase; GGT, gamma glutamyl transpeptidase; HbA1c, glycosylated hemoglobin; HOMA-IR, Homeostatic Model Assessment for Insulin Resistance.

<sup>a</sup>Values are expressed as mean ± standard deviation.

<sup>b</sup>Gender was not matched as gender did not affect the expression of bile acid related genes.

<sup>c</sup>Blood samples were collected after overnight fast.
