# Supplementary material
Source: HighWire-hosted journal article supplement (https://gut.bmj.com/content/67/10/1881)
Supplement: inline-supplementary-material-2 [file inline-supplementary-material-2.pdf]

**Supplementary Table 2.** Correlation between gender and the expression levels of bile acid related genes in NASH livers and healthy controls

| <b>Gene</b> | <b>Correlation coefficient (r)</b> | <b>p value</b> |
|-------------|------------------------------------|----------------|
| CYP7A1      | -0.19                              | 0.291          |
| CYP27A1     | -0.231                             | 0.195          |
| CYP8B1      | -0.157                             | 0.382          |
| CYP7B1      | -0.007                             | 0.971          |
| BAAT        | -0.297                             | 0.094          |
| BACS        | 0.02                               | 0.913          |
| NTCP        | -0.024                             | 0.896          |
| OATP1B1     | -0.197                             | 0.271          |
| OATP1B3     | -0.253                             | 0.155          |
| BSEP        | -0.206                             | 0.251          |
| FXR         | 0.265                              | 0.137          |
| SHP         | -0.301                             | 0.089          |
| HNF4A       | -0.191                             | 0.288          |
| FGFR4       | -0.222                             | 0.215          |
| KLB         | 0.132                              | 0.463          |
