# Supplementary material
Source: HighWire-hosted journal article supplement (https://gut.bmj.com/content/67/10/1881)
Supplement: inline-supplementary-material-3 [file inline-supplementary-material-3.pdf]

Supplementary Table 3. Primers for qRT-PCR

| Species | Gene    |         | Sequences                      |
|---------|---------|---------|--------------------------------|
| Human   | CYP7A1  | Forward | tatgtccatttcacacaaatcccttg     |
|         |         | Reverse | cgggtcaatgcttctgtgcccaaatgc    |
| Human   | CYP7B1  | Forward | tgataaaagggttgcttccttatctg     |
|         |         | Reverse | cttaattgtttatgatttttatcactagc  |
| Human   | CYP8B1  | Forward | cgcttctgctattacatcttgttca      |
|         |         | Reverse | gtagacaaacctgggaaaagaagg       |
| Human   | CYP27A1 | Forward | cttagaggagattccacgtctagga      |
|         |         | Reverse | taagtaggacatccacattggaccg      |
| Human   | BAAT    | Forward | taacagatttgaatattttgaggaggc    |
|         |         | Reverse | tgacttgctttaggtaaatagccataga   |
| Human   | BACS    | Forward | cacagctgatgatgtggttacacg       |
|         |         | Reverse | cagaagcaggaagtagagaactgg       |
| Human   | FXR     | Forward | gatgggaatgtggctgaatgatgat      |
|         |         | Reverse | aagtcacgaccttactgtcttcatt      |
| Human   | SHP     | Forward | ttcaatgctgtctggagtccttctggag   |
|         |         | Reverse | caccagggttccaggacttcacacagcac  |
| Human   | HNF4A   | Forward | ttccggaggagcgtgcggaagaaccacatg |
|         |         | Reverse | ctgcagtagcggcactggttctctgtcc   |
| Human   | FGFR4   | Forward | tcttgtccctggaggcctctgaggaagtg  |
|         |         | Reverse | caagggtactgtcagctcctgctcttgc   |
| Human   | KLB     | Forward | aactggattaactggaatacaacaacc    |
|         |         | Reverse | taaccaaacactcgtatttcatctaacc   |
| Human   | BSEP    | Forward | cattatttcctctggcttctcaaattc    |
|         |         | Reverse | tttatcygactcaaaacctcattctcc    |
| Human   | NTCP    | Forward | tgaaggacaaggtgccctataaaggcatcg |
|         |         | Reverse | cacactgcacaagagaatgatgatcatc   |
| Human   | OATPB1  | Forward | ctgtgatgtcattgtcctttacctatt    |
|         |         | Reverse | gttgcaataagaaagtggtacatctcta   |
| Human   | OATPB3  | Forward | gtttccagtcaatggttataagaacact   |
|         |         | Reverse | acggaattatatacctacaagctcctt    |
| Rat     | CYP7A1  | Forward | tgcatatggtttattgttgaataagga    |
|         |         | Reverse | attagctcttaggaactcaagaggatta   |
| Rat     | CYP8B1  | Forward | ccttactccaaatcctatcgattcagac   |
|         |         | Reverse | attaagaacttaacaattgcacacatgg   |
| Rat     | CYP27A1 | Forward | ctaaggaattgctcagtcctcaagaga    |
|         |         | Reverse | gatctctgggttctttgaaagggtgatac  |
| Rat     | FXR     | Forward | tcgtagaattcacaaaaagactccag     |
|         |         | Reverse | aagtttctattgaaaatctccgctgaa    |
| Rat     | SHP     | Forward | atacctgaaaggcactatccttcaac     |
|         |         | Reverse | gacttcacacaatgccagtgga         |
| Rat     | HNF4A   | Forward | gagtttgaaaatgtgcaggtgttgac     |
|         |         | Reverse | gctgttgatgagttgaggttg          |
| Rat     | FGFR4   | Forward | ccttccacggagagaatcgtatc        |

|     |      |         |                              |
|-----|------|---------|------------------------------|
| Rat | BSEP | Reverse | ctaccagagagttctccacaagac     |
|     |      | Forward | tgaaatgatcaaattctctggcatctac |
|     |      | Reverse | aaatctctcattctccttatctgacg   |
| Rat | NTCP | Forward | gaaggacttctcatcatcattatcttc  |
|     |      | Reverse | cagcagctttgtaggtaatctgttg    |

---
