# Supplementary material
Source: HighWire-hosted journal article supplement (https://gut.bmj.com/content/67/10/1881)
Supplement: inline-supplementary-material-4 [file inline-supplementary-material-4.pdf]

**Supplementary Table 4. Correlation between mRNA expression of HNF4A and its target genes**

|                | <b>Correlation<br/>Coefficient (r)</b> | <b>p value</b> |
|----------------|----------------------------------------|----------------|
| <b>CYP7A1</b>  | 0.433                                  | 0.012          |
| <b>CYP8B1</b>  | 0.828                                  | <0.0001        |
| <b>CYP27A1</b> | 0.869                                  | <0.0001        |
| <b>BAAT</b>    | 0.399                                  | 0.021          |
| <b>BACS</b>    | 0.672                                  | <0.0001        |
| <b>NTCP</b>    | 0.69                                   | <0.0001        |
