# Supplementary material
Source: HighWire-hosted journal article supplement (https://gut.bmj.com/content/67/10/1881)
Supplement: inline-supplementary-material-5 [file inline-supplementary-material-5.pdf]

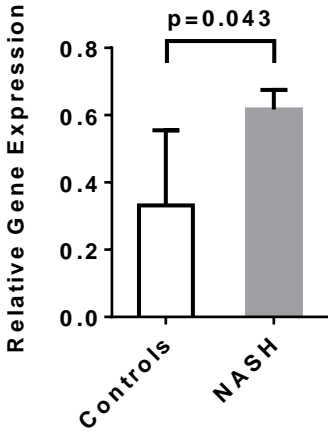

Supplementary Figure 1. PON1 expression in NASH livers and healthy controls. Quantitative RT-PCR analysis of hepatic expression of PON1. Plotted values are the mean ± SEM. P value is indicated.
