# Supplementary material
Source: HighWire-hosted journal article supplement (https://gut.bmj.com/content/67/10/1881)
Supplement: inline-supplementary-material-6 [file inline-supplementary-material-6.pdf]

Supplementary Table 5. Differential pathways in the gut microbiome between NASH patients and controls<sup>a</sup>

| Pathway <sup>b</sup>                                | Abundance <sup>c</sup> | State <sup>d</sup> | LDA score<br>(log10) <sup>e</sup> | P value <sup>f</sup> |
|-----------------------------------------------------|------------------------|--------------------|-----------------------------------|----------------------|
| Transcription factors                               | 4.2405                 | Control            | 3.1130                            | 0.0021               |
| Bisphenol degradation                               | 2.9400                 | Control            | 2.0850                            | 0.0211               |
| Glycolysis,Gluconeogenesis                          | 4.0528                 | Control            | 2.6145                            | 0.0001               |
| Germination                                         | 2.7262                 | Control            | 2.1170                            | 0.0002               |
| Glycerolipid metabolism                             | 3.5951                 | Control            | 2.5566                            | 0.0003               |
| Porphyrin and chlorophyll metabolism                | 4.0370                 | Control            | 2.8661                            | 0.0031               |
| Signal transduction mechanisms                      | 3.6936                 | Control            | 2.4495                            | 0.0101               |
| Benzoate degradation                                | 3.3370                 | Control            | 2.4952                            | 0.0130               |
| C5-Branched dibasic acid metabolism                 | 3.5664                 | Control            | 2.6241                            | 0.0001               |
| Lysine biosynthesis                                 | 3.9658                 | Control            | 2.7877                            | 0.0005               |
| Bacterial chemotaxis                                | 3.5144                 | Control            | 2.6144                            | 0.0065               |
| Phenyl propanoid biosynthesis                       | 3.2117                 | Control            | 2.2986                            | 0.0060               |
| Pyruvate metabolism                                 | 4.0346                 | Control            | 2.6934                            | 0.0021               |
| RNA transport                                       | 3.1924                 | Control            | 2.1309                            | 0.0019               |
| Fatty acid elongation in mitochondria               | 0.1111                 | Control            | 2.2405                            | 0.0311               |
| Arginine and proline metabolism                     | 4.1243                 | Control            | 2.9697                            | 0.0002               |
| Nitrotoluene degradation                            | 3.0510                 | Control            | 2.1979                            | 0.0153               |
| Cytoskeleton proteins                               | 3.6129                 | Control            | 2.4521                            | 0.0001               |
| Tetracycline biosynthesis                           | 3.2321                 | Control            | 2.3235                            | 0.0031               |
| Xylene degradation                                  | 2.8083                 | Control            | 2.0001                            | 0.0041               |
| ABC transporters                                    | 4.5428                 | Control            | 3.5453                            | 0.0019               |
| Atrazine degradation                                | 2.4896                 | Control            | 2.0454                            | 0.0003               |
| Chloroalkane and chloroalkene degradation           | 3.3350                 | Control            | 2.6168                            | 0.0000               |
| Fructose and mannose metabolism                     | 4.0242                 | Control            | 2.6166                            | 0.0180               |
| Fatty acid biosynthesis                             | 3.6964                 | Control            | 2.1085                            | 0.0413               |
| Phenylalanine,tyrosine and tryptophan biosynthesis  | 3.9617                 | Control            | 2.7138                            | 0.0006               |
| Sporulation                                         | 3.9492                 | Control            | 3.2963                            | 0.0002               |
| Pentose phosphate pathway                           | 3.9613                 | Control            | 2.5966                            | 0.0021               |
| Starch and sucrose metabolism                       | 4.0440                 | Control            | 2.8980                            | 0.0003               |
| Valine,leucine and isoleucine biosynthesis          | 3.9218                 | Control            | 3.0072                            | 0.0000               |
| Pantothenate and CoA biosynthesis                   | 3.8347                 | Control            | 2.4599                            | 0.0001               |
| Transporters                                        | 4.8492                 | Control            | 3.8774                            | 0.0007               |
| Methane metabolism                                  | 4.1509                 | Control            | 2.8710                            | 0.0050               |
| Glycosaminoglycan degradation                       | 3.0727                 | NASH               | 2.4027                            | 0.0287               |
| Pertussis                                           | 2.6665                 | NASH               | 2.2059                            | 0.0004               |
| Ubiquinone and other terpenoid,quinone biosynthesis | 3.4063                 | NASH               | 2.8570                            | 0.0004               |
| Vitamin B6 metabolism                               | 3.3398                 | NASH               | 2.1716                            | 0.0045               |
| Purine metabolism                                   | 4.3835                 | NASH               | 3.0163                            | 0.0002               |
| Glycosyl transferases                               | 3.6155                 | NASH               | 2.7060                            | 0.0000               |
| Cellular antigens                                   | 2.8885                 | NASH               | 2.3846                            | 0.0003               |
| <b>Glycine,serine and threonine metabolism</b>      | <b>3.9467</b>          | <b>NASH</b>        | <b>2.0796</b>                     | <b>0.0054</b>        |
| Carbon fixation in photosynthetic organisms         | 3.8374                 | NASH               | 2.3654                            | 0.0228               |
| Citratecycle(TCA cycle)                             | 3.8644                 | NASH               | 2.9492                            | 0.0002               |

|                                                 |               |             |               |               |
|-------------------------------------------------|---------------|-------------|---------------|---------------|
| Folate biosynthesis                             | 3.6814        | NASH        | 2.6058        | 0.0000        |
| Valine,leucineand isoleucine degradation        | 3.3389        | NASH        | 2.0561        | 0.0008        |
| Lysosome                                        | 3.2242        | NASH        | 2.4532        | 0.0385        |
| Homologous recombination                        | 3.9948        | NASH        | 2.5726        | 0.0085        |
| Peroxisome                                      | 3.2940        | NASH        | 2.1046        | 0.0180        |
| General function prediction only                | 4.5748        | NASH        | 2.8008        | 0.0003        |
| Nitrogen metabolism                             | 3.8805        | NASH        | 2.4369        | 0.0028        |
| Pyrimidine metabolism                           | 4.2988        | NASH        | 2.9902        | 0.0028        |
| Energy metabolism                               | 3.9804        | NASH        | 2.7569        | 0.0002        |
| Carbon fixation pathways in prokaryotes         | 4.0602        | NASH        | 2.8986        | 0.0001        |
| Glutathione metabolism                          | 3.3891        | NASH        | 2.5713        | 0.0002        |
| Huntingtons disease                             | 2.5136        | NASH        | 2.0044        | 0.0002        |
| RNA degradation                                 | 3.7000        | NASH        | 2.3636        | 0.0010        |
| Function unknown                                | 4.1099        | NASH        | 2.7177        | 0.0444        |
| DNA replication                                 | 3.8408        | NASH        | 2.4472        | 0.0195        |
| Glycan biosynthesis and metabolism              | 2.6174        | NASH        | 2.0970        | 0.0005        |
| Prenyl transferases                             | 3.5569        | NASH        | 2.4847        | 0.0017        |
| Inorganic ion transport and metabolism          | 3.3427        | NASH        | 2.3311        | 0.0228        |
| Glycosphingolipid biosynthesis-ganglio series   | 2.9656        | NASH        | 2.3378        | 0.0141        |
| Lipopolysaccharide biosynthesis proteins        | 3.7170        | NASH        | 3.1659        | 0.0001        |
| Peptidases                                      | 4.3036        | NASH        | 2.8211        | 0.0130        |
| Drug metabolism-other enzymes                   | 3.5617        | NASH        | 2.3586        | 0.0017        |
| Otherion-coupled transporters                   | 4.1523        | NASH        | 2.8750        | 0.0008        |
| Cell motility and secretion                     | 3.2602        | NASH        | 2.4125        | 0.0003        |
| Translation factors                             | 3.7595        | NASH        | 2.4290        | 0.0228        |
| Protein digestion and absorption                | 2.6948        | NASH        | 2.2083        | 0.0008        |
| Vibrio cholerae pathogenic cycle                | 2.9208        | NASH        | 2.1480        | 0.0002        |
| Protein folding and associated processing       | 3.8473        | NASH        | 2.5427        | 0.0006        |
| Bacterial secretion system                      | 3.7739        | NASH        | 2.4927        | 0.0228        |
| Arachidonic acid metabolism                     | 2.7012        | NASH        | 2.2787        | 0.0002        |
| Membrane and intracellular structural molecules | 3.8592        | NASH        | 3.1293        | 0.0001        |
| Oxidative phosphorylation                       | 4.1024        | NASH        | 2.6713        | 0.0008        |
| DNA replication proteins                        | 4.1189        | NASH        | 2.7596        | 0.0166        |
| Chaperones and folding catalysts                | 4.0651        | NASH        | 2.9453        | 0.0001        |
| Toluene degradation                             | 3.1063        | NASH        | 2.3290        | 0.0002        |
| Nicotinate and nicotinamide metabolism          | 3.6907        | NASH        | 2.5111        | 0.0050        |
| <b>Taurine and hypotaurine metabolism</b>       | <b>3.0882</b> | <b>NASH</b> | <b>2.0020</b> | <b>0.0003</b> |
| Riboflavin metabolism                           | 3.4798        | NASH        | 2.5463        | 0.0000        |
| Lipopolysaccharide biosynthesis                 | 3.5725        | NASH        | 3.0927        | 0.0001        |
| One carbon pool by folate                       | 3.8422        | NASH        | 2.6821        | 0.0054        |
| Pores ion channels                              | 3.6983        | NASH        | 3.0405        | 0.0001        |
| Chromosome                                      | 4.2122        | NASH        | 2.7941        | 0.0246        |

LDA, linear discriminant analysis.

<sup>a</sup>LDA was performed with LEfSe. (<http://huttenhower.sph.harvard.edu/galaxy>).

<sup>b</sup>KEGG pathways that are differentially represented in the gut microbiome between NASH patients and controls.

<sup>c</sup>The logarithm mean of pathway abundance in the higer presented group.

<sup>d</sup>The disease state with the higer abundance of the pathways.

<sup>e</sup>logarithmic LDA score. LDA score is equal or larger than 2 to be considered as discriminative pathways.

<sup>f</sup>Kruskall-Wallis test.
