# Supplementary material
Source: HighWire-hosted journal article supplement (https://gut.bmj.com/content/67/10/1881)
Supplement: inline-supplementary-material-7 [file inline-supplementary-material-7.pdf]

Supplementary Table 6. Differential taxa in the gut microbiome between HFD fed rats and controls<sup>a</sup>

| Taxa <sup>b</sup>                                                                                 | Control (%) <sup>c</sup> | HFD (%) <sup>d</sup> | SD (control) <sup>e</sup> | SD (HFD) <sup>f</sup> | P value <sup>g</sup> | FDR <sup>h</sup> |
|---------------------------------------------------------------------------------------------------|--------------------------|----------------------|---------------------------|-----------------------|----------------------|------------------|
| p__Actinobacteria                                                                                 | 4.029778902              | 0.3484431            | 2.412013301               | 0.18069445            | 0.00216              | 0.008            |
| p__Actinobacteria;c__Actinobacteria                                                               | 3.665722584              | 0.1226354            | 2.222434776               | 0.08057401            | 0.00216              | 0.015            |
| p__Actinobacteria;c__Actinobacteria;o__Actinomycetales                                            | 3.30E-03                 | 0.1039172            | 3.22E-03                  | 0.08145077            | 0.00433              | 0.019            |
| p__Actinobacteria;c__Actinobacteria;o__Actinomycetales;f__Corynebacteriaceae                      | 0                        | 2.90E-03             | 0                         | 1.66E-03              | 0.00278              | 0.02             |
| p__Actinobacteria;c__Actinobacteria;o__Actinomycetales;f__Corynebacteriaceae;g__Corynebacterium   | 0                        | 2.90E-03             | 0                         | 1.66E-03              | 0.00278              | 0.022            |
| p__Actinobacteria;c__Actinobacteria;o__Actinomycetales;f__Micrococcaceae                          | 3.30E-03                 | 0.1010146            | 3.22E-03                  | 0.08042155            | 0.00433              | 0.02             |
| p__Actinobacteria;c__Actinobacteria;o__Actinomycetales;f__Micrococcaceae;g__Rothia                | 3.30E-03                 | 0.1010146            | 3.22E-03                  | 0.08042155            | 0.00433              | 0.022            |
| p__Actinobacteria;c__Actinobacteria;o__Bifidobacteriales                                          | 3.662426587              | 0.0187181            | 2.223961236               | 0.04305751            | 0.005                | 0.019            |
| p__Actinobacteria;c__Actinobacteria;o__Bifidobacteriales;f__Bifidobacteriaceae                    | 3.662426587              | 0.0187181            | 2.223961236               | 0.04305751            | 0.005                | 0.02             |
| p__Actinobacteria;c__Actinobacteria;o__Bifidobacteriales;f__Bifidobacteriaceae;g__Bifidobacterium | 3.662426587              | 0.0187181            | 2.223961236               | 0.04305751            | 0.005                | 0.023            |
| p__Actinobacteria;c__Coriobacteriia;o__Coriobacteriales;f__Coriobacteriaceae;g__                  | 0.079428326              | 2.09E-03             | 0.073136173               | 1.45E-03              | 0.00216              | 0.022            |
| p__Bacteroidetes;c__Bacteroidia;o__Bacteroidales;f__[Odoribacteraceae];g__Odoribacter             | 0                        | 0.0724992            | 0                         | 0.0573085             | 0.00278              | 0.022            |
| p__Bacteroidetes;c__Bacteroidia;o__Bacteroidales;f__Bacteroidaceae                                | 1.124305572              | 6.4851276            | 0.43558414                | 4.75443102            | 0.00866              | 0.03             |
| p__Bacteroidetes;c__Bacteroidia;o__Bacteroidales;f__Bacteroidaceae;g__Bacteroides                 | 1.124305572              | 6.4851276            | 0.43558414                | 4.75443102            | 0.00866              | 0.033            |
| p__Bacteroidetes;c__Bacteroidia;o__Bacteroidales;f__Rikenellaceae;g__AF12                         | 0                        | 0.0407839            | 0                         | 0.03582782            | 0.00962              | 0.033            |
| p__Bacteroidetes;c__Bacteroidia;o__Bacteroidales;f__Rikenellaceae;g__Alistipes                    | 0.02800352               | 0.0573831            | 7.15E-03                  | 0.0381522             | 0.01515              | 0.044            |
| p__Bacteroidetes;c__Bacteroidia;o__Bacteroidales;f__S24-7                                         | 7.821278606              | 1.8445615            | 1.607441647               | 0.98151079            | 0.00216              | 0.02             |
| p__Bacteroidetes;c__Bacteroidia;o__Bacteroidales;f__S24-7;g__                                     | 7.821278606              | 1.8445615            | 1.607441647               | 0.98151079            | 0.00216              | 0.022            |
| p__Deferribacteres                                                                                | 0                        | 0.1401949            | 0                         | 0.10336137            | 0.00278              | 0.008            |
| p__Deferribacteres;c__Deferribacteres                                                             | 0                        | 0.1401949            | 0                         | 0.10336137            | 0.00278              | 0.015            |
| p__Deferribacteres;c__Deferribacteres;o__Deferribacterales                                        | 0                        | 0.1401949            | 0                         | 0.10336137            | 0.00278              | 0.019            |
| p__Deferribacteres;c__Deferribacteres;o__Deferribacterales;f__Deferribacteraceae                  | 0                        | 0.1401949            | 0                         | 0.10336137            | 0.00278              | 0.02             |
| p__Deferribacteres;c__Deferribacteres;o__Deferribacterales;f__Deferribacteraceae;g__Mucispirillum | 0                        | 0.1401949            | 0                         | 0.10336137            | 0.00278              | 0.022            |
| p__Firmicutes;c__Bacilli                                                                          | 17.47981426              | 3.5316271            | 6.501191468               | 6.83021191            | 0.01515              | 0.048            |
| p__Firmicutes;c__Bacilli;o__Bacillales;f__Bacillaceae                                             | 2.29E-03                 | 0                    | 1.42E-03                  | 0                     | 0.00962              | 0.03             |
| p__Firmicutes;c__Bacilli;o__Bacillales;f__Bacillaceae;Other                                       | 2.29E-03                 | 0                    | 1.42E-03                  | 0                     | 0.00962              | 0.033            |
| p__Firmicutes;c__Bacilli;o__Lactobacillales;f__Aerococcaceae                                      | 6.66E-04                 | 0.0115024            | 1.04E-03                  | 7.39E-03              | 0.00434              | 0.02             |
| p__Firmicutes;c__Bacilli;o__Lactobacillales;f__Aerococcaceae;g__Facklamia                         | 6.66E-04                 | 0.0115024            | 1.04E-03                  | 7.39E-03              | 0.00434              | 0.022            |
| p__Firmicutes;c__Bacilli;o__Lactobacillales;f__Enterococcaceae                                    | 1.13E-03                 | 6.97E-03             | 1.37E-03                  | 4.25E-03              | 0.01291              | 0.039            |
| p__Firmicutes;c__Bacilli;o__Lactobacillales;f__Enterococcaceae;g__Enterococcus                    | 1.13E-03                 | 6.97E-03             | 1.37E-03                  | 4.25E-03              | 0.01291              | 0.042            |
| p__Firmicutes;c__Bacilli;o__Lactobacillales;f__Lactobacillaceae;Other                             | 0.323285979              | 0.0184738            | 0.116648939               | 0.03227513            | 0.005                | 0.023            |
| p__Firmicutes;c__Bacilli;o__Lactobacillales;f__Streptococcaceae                                   | 0.044953138              | 0.1935069            | 0.064213032               | 0.11350143            | 0.01515              | 0.043            |
| p__Firmicutes;c__Bacilli;o__Lactobacillales;f__Streptococcaceae;g__Streptococcus                  | 0.023636544              | 0.158998             | 0.026170316               | 0.10667991            | 0.01515              | 0.044            |
| p__Firmicutes;c__Bacilli;o__Lactobacillales;Other                                                 | 0.154968687              | 7.65E-03             | 0.072441346               | 0.01499157            | 0.00433              | 0.02             |
| p__Firmicutes;c__Bacilli;o__Lactobacillales;Other;Other                                           | 0.154968687              | 7.65E-03             | 0.072441346               | 0.01499157            | 0.00433              | 0.022            |
| p__Firmicutes;c__Bacilli;o__Turicibacterales                                                      | 4.994804053              | 0.1178966            | 2.798551225               | 0.06647922            | 0.00216              | 0.019            |
| p__Firmicutes;c__Bacilli;o__Turicibacterales;f__Turicibacteraceae                                 | 4.994804053              | 0.1178966            | 2.798551225               | 0.06647922            | 0.00216              | 0.02             |
| p__Firmicutes;c__Bacilli;o__Turicibacterales;f__Turicibacteraceae;g__Turicibacter                 | 4.994804053              | 0.1178966            | 2.798551225               | 0.06647922            | 0.00216              | 0.022            |

|                                                                                                        |             |           |             |            |         |       |
|--------------------------------------------------------------------------------------------------------|-------------|-----------|-------------|------------|---------|-------|
| p__Firmicutes;c__Bacilli;Other                                                                         | 0.324073188 | 9.15E-03  | 0.157308671 | 0.01960309 | 0.00477 | 0.019 |
| p__Firmicutes;c__Bacilli;Other;Other                                                                   | 0.324073188 | 9.15E-03  | 0.157308671 | 0.01960309 | 0.00477 | 0.02  |
| p__Firmicutes;c__Bacilli;Other;Other;Other                                                             | 0.324073188 | 9.15E-03  | 0.157308671 | 0.01960309 | 0.00477 | 0.023 |
| p__Firmicutes;c__Clostridia;o__Clostridiales;f__Christensenellaceae                                    | 0.018218227 | 0.3909521 | 0.011258285 | 0.39967209 | 0.00216 | 0.02  |
| p__Firmicutes;c__Clostridia;o__Clostridiales;f__Christensenellaceae;g__                                | 0.018218227 | 0.389203  | 0.011258285 | 0.39940752 | 0.00216 | 0.022 |
| p__Firmicutes;c__Clostridia;o__Clostridiales;f__Clostridiaceae;g__Clostridium                          | 0.630691462 | 0.2369333 | 0.204960357 | 0.14035892 | 0.00433 | 0.022 |
| p__Firmicutes;c__Clostridia;o__Clostridiales;f__Dehalobacteriaceae                                     | 0.056302768 | 0.1722881 | 0.034714207 | 0.08276419 | 0.00866 | 0.03  |
| p__Firmicutes;c__Clostridia;o__Clostridiales;f__Dehalobacteriaceae;g__Dehalobacterium                  | 0.056302768 | 0.1722881 | 0.034714207 | 0.08276419 | 0.00866 | 0.033 |
| p__Firmicutes;c__Clostridia;o__Clostridiales;f__Lachnospiraceae;g__Anaerostipes                        | 0.020361012 | 1.07E-03  | 0.014501235 | 1.68E-03   | 0.00434 | 0.022 |
| p__Firmicutes;c__Clostridia;o__Clostridiales;f__Lachnospiraceae;g__Blautia                             | 0.021973444 | 0.7060149 | 0.047345874 | 0.63162652 | 0.01152 | 0.038 |
| p__Firmicutes;c__Clostridia;o__Clostridiales;f__Lachnospiraceae;g__Clostridium                         | 0.04538691  | 0         | 0.048416056 | 0          | 0.00962 | 0.033 |
| p__Firmicutes;c__Clostridia;o__Clostridiales;f__Peptococcaceae                                         | 0.282804404 | 2.5338338 | 0.145573425 | 2.0048704  | 0.00433 | 0.02  |
| p__Firmicutes;c__Clostridia;o__Clostridiales;f__Peptococcaceae;g__rc4-4                                | 0.241020183 | 1.23565   | 0.160168574 | 1.40019644 | 0.01515 | 0.044 |
| p__Firmicutes;c__Clostridia;o__Clostridiales;f__Ruminococcaceae;g__Anaerotruncus                       | 5.98E-03    | 0.0347436 | 2.87E-03    | 0.01798264 | 0.00216 | 0.022 |
| p__Firmicutes;c__Clostridia;o__Clostridiales;f__Ruminococcaceae;g__Butyricicoccus                      | 0.164552074 | 5.54E-04  | 0.0796705   | 9.02E-04   | 0.00434 | 0.022 |
| p__Firmicutes;c__Clostridia;o__Clostridiales;f__Ruminococcaceae;g__Clostridium                         | 0           | 2.19E-03  | 0           | 1.59E-03   | 0.00962 | 0.033 |
| p__Firmicutes;c__Clostridia;o__Clostridiales;f__Ruminococcaceae;g__Oscillospira                        | 4.524759919 | 9.9619908 | 2.478863413 | 3.82110116 | 0.01515 | 0.044 |
| p__Firmicutes;c__Erysipelotrichi;o__Erysipelotrichales;f__Erysipelotrichaceae;g__Clostridium           | 0           | 0.0830312 | 0           | 0.04904153 | 0.00278 | 0.022 |
| p__Firmicutes;c__Erysipelotrichi;o__Erysipelotrichales;f__Erysipelotrichaceae;g__Coprobacillus         | 0           | 0.0252972 | 0           | 0.03144246 | 0.00962 | 0.033 |
| p__Firmicutes;Other                                                                                    | 0.815320052 | 0.1435231 | 0.266351889 | 0.21627993 | 0.00433 | 0.019 |
| p__Firmicutes;Other;Other                                                                              | 0.815320052 | 0.1435231 | 0.266351889 | 0.21627993 | 0.00433 | 0.019 |
| p__Firmicutes;Other;Other;Other                                                                        | 0.815320052 | 0.1435231 | 0.266351889 | 0.21627993 | 0.00433 | 0.02  |
| p__Firmicutes;Other;Other;Other;Other                                                                  | 0.815320052 | 0.1435231 | 0.266351889 | 0.21627993 | 0.00433 | 0.022 |
| p__Proteobacteria                                                                                      | 0.336951146 | 1.6402371 | 0.166955946 | 0.76254071 | 0.00216 | 0.008 |
| p__Proteobacteria;c__Alphaproteobacteria;o__Caulobacterales                                            | 0           | 2.09E-03  | 0           | 1.25E-03   | 0.00278 | 0.019 |
| p__Proteobacteria;c__Alphaproteobacteria;o__Caulobacterales;f__Caulobacteraceae                        | 0           | 2.09E-03  | 0           | 1.25E-03   | 0.00278 | 0.02  |
| p__Proteobacteria;c__Deltaproteobacteria                                                               | 0.084824713 | 1.1225817 | 0.035997123 | 0.5392137  | 0.00216 | 0.015 |
| p__Proteobacteria;c__Deltaproteobacteria;o__Desulfovibrionales                                         | 0.084824713 | 1.1213819 | 0.035997123 | 0.53819368 | 0.00216 | 0.019 |
| p__Proteobacteria;c__Deltaproteobacteria;o__Desulfovibrionales;f__Desulfovibrionaceae                  | 0.078739657 | 1.0632701 | 0.034198833 | 0.5153079  | 0.00216 | 0.02  |
| p__Proteobacteria;c__Deltaproteobacteria;o__Desulfovibrionales;f__Desulfovibrionaceae;g__              | 0.066107278 | 0.5151498 | 0.027528972 | 0.28295205 | 0.00216 | 0.022 |
| p__Proteobacteria;c__Deltaproteobacteria;o__Desulfovibrionales;f__Desulfovibrionaceae;g__Bilophila     | 0           | 0.3608243 | 0           | 0.23864018 | 0.00278 | 0.022 |
| p__Proteobacteria;c__Deltaproteobacteria;o__Desulfovibrionales;f__Desulfovibrionaceae;g__Desulfovibrio | 0.01263238  | 0.1611189 | 0.010611456 | 0.06009563 | 0.00216 | 0.022 |
| p__Proteobacteria;c__Deltaproteobacteria;o__Desulfovibrionales;f__Desulfovibrionaceae;Other            | 0           | 0.0261771 | 0           | 0.02164655 | 0.00278 | 0.022 |
| p__Proteobacteria;c__Deltaproteobacteria;o__Desulfovibrionales;Other                                   | 6.09E-03    | 0.0581118 | 2.89E-03    | 0.02710348 | 0.00216 | 0.02  |
| p__Proteobacteria;c__Deltaproteobacteria;o__Desulfovibrionales;Other;Other                             | 6.09E-03    | 0.0581118 | 2.89E-03    | 0.02710348 | 0.00216 | 0.022 |
| p__Proteobacteria;Other                                                                                | 0           | 3.28E-03  | 0           | 2.06E-03   | 0.00962 | 0.035 |
| p__Proteobacteria;Other;Other                                                                          | 0           | 3.28E-03  | 0           | 2.06E-03   | 0.00962 | 0.033 |
| p__Proteobacteria;Other;Other;Other                                                                    | 0           | 3.28E-03  | 0           | 2.06E-03   | 0.00962 | 0.03  |
| p__Proteobacteria;Other;Other;Other;Other                                                              | 0           | 3.28E-03  | 0           | 2.06E-03   | 0.00962 | 0.033 |
| p__Tenericutes                                                                                         | 0.11308136  | 0.8627701 | 0.057036266 | 0.43285286 | 0.00216 | 0.008 |
| p__Tenericutes;c__Mollicutes                                                                           | 0.11308136  | 0.8614017 | 0.057036266 | 0.43127912 | 0.00216 | 0.015 |
| p__Tenericutes;c__Mollicutes;o__Anaeroplasmatales                                                      | 0.028497408 | 0.5637793 | 0.035707217 | 0.3622443  | 0.00433 | 0.019 |

|                                                                                         |             |           |             |           |         |       |
|-----------------------------------------------------------------------------------------|-------------|-----------|-------------|-----------|---------|-------|
| p__Tenericutes;c__Mollicutes;o__Anaeroplasmatales;f__Anaeroplasmataceae                 | 0.028497408 | 0.5637793 | 0.035707217 | 0.3622443 | 0.00433 | 0.02  |
| p__Tenericutes;c__Mollicutes;o__Anaeroplasmatales;f__Anaeroplasmataceae;g__Anaeroplasma | 0.028497408 | 0.562291  | 0.035707217 | 0.3608432 | 0.00433 | 0.022 |
| p__TM7                                                                                  | 3.37E-03    | 0.0159886 | 3.81E-03    | 0.0122354 | 0.02002 | 0.044 |

FDR, False discovery rate; SD, standard deviation.

<sup>a</sup> Rats were fed with HFD or standard chow for 16 weeks.

<sup>b</sup> Taxa that are differentially represented between HFD fed rats and controls.

<sup>c</sup> Average abundance in control rats .

<sup>d</sup> Average abundance in HFD fed rats.

<sup>e</sup> Standard Deviation of the taxa in control rats .

<sup>f</sup> Standard Deviation of taxa in HFD fed rats.

<sup>g</sup> Wilcox test.

<sup>h</sup> FDR adjusted P values. FDR less than 0.05 were considered significantly different.
